# Supplementary material for: Additive Manufacturing of Nerve Guidance Conduits for Regeneration of Injured Peripheral Nerves
Source: Frontiers journal article supplement (doi:10.3389/fbioe.2020.590596), 2020-09-25
Supplement: Data_Sheet_6.PDF [file Data_Sheet_6.PDF]

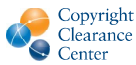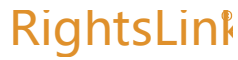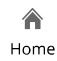

Home

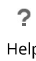

Help

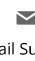

Email Support

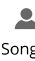

Shaochen Song ▾

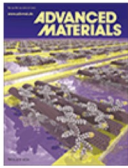

## 25th Anniversary Article: Engineering Hydrogels for Biofabrication

**Author:** Dietmar W. Hutmacher, Jürgen Groll, Wouter J. A. Dhert, et al

**Publication:** Advanced Materials

**Publisher:** John Wiley and Sons

**Date:** Aug 23, 2013

© 2013 WILEY-VCH Verlag GmbH & Co. KGaA, Weinheim

### Order Completed

Thank you for your order.

This Agreement between Dr. Shaochen Song ("You") and John Wiley and Sons ("John Wiley and Sons") consists of your license details and the terms and conditions provided by John Wiley and Sons and Copyright Clearance Center.

Your confirmation email will contain your order number for future reference.

**License Number** 4899380432649

[Printable Details](#)

**License date** Aug 31, 2020

#### ☒ Licensed Content

**Licensed Content Publisher** John Wiley and Sons

**Licensed Content Publication** Advanced Materials

**Licensed Content Title** 25th Anniversary Article: Engineering Hydrogels for Biofabrication

**Licensed Content Author** Dietmar W. Hutmacher, Jürgen Groll, Wouter J. A. Dhert, et al

**Licensed Content Date** Aug 23, 2013

**Licensed Content Volume** 25

**Licensed Content Issue** 36

**Licensed Content Pages** 18

#### ☒ Order Details

**Type of use** Journal/Magazine

**Requestor type** University/Academic

**Is the reuse sponsored by or associated with a pharmaceutical or medical products company?** no

**Format** Electronic

**Portion** Figure/table

**Number of figures/tables** 2

**Will you be translating?** No

**Circulation** 1 - 29

#### ☒ About Your Work

**Title of new article** Additive Manufacturing of Nerve Guidance Conduits for Regeneration of Injured Peripheral Nerves

**Lead author** Shaochen Song

**Title of targeted journal** Frontiers in Bioengineering and Biotechnology

**Publisher** Frontiers Media S.A.

**Expected publication date** Sep 2020

#### ☒ Additional Data

**Portions** Figure 2

#### ☒ Requestor Location

**Requestor Location** Dr. Shaochen Song  
#403, 4 Nongkeyuanjia shulou,  
Lv yuan Dist

Changchun, Jilin Province 130021  
China  
Attn: Nerve regeneration

#### ☒ Tax Details

**Publisher Tax ID** EU826007151

#### \$ Price

**Total** 0.00 CHF

Would you like to purchase the full text of this article? If so, please continue on to the content ordering system located here:

[Purchase PDF](#)

If you click on the buttons below or close this window, you will not be able to return to the content ordering system.

**Total: 0.00 CHF****CLOSE WINDOW****ORDER MORE**

© 2020 Copyright - All Rights Reserved | [Copyright Clearance Center, Inc.](#) | [Privacy statement](#) | [Terms and Conditions](#)  
Comments? We would like to hear from you. E-mail us at [customercare@copyright.com](mailto:customercare@copyright.com)
